# Supplementary material for: Bacterial communities of the psyllid pest Bactericera cockerelli (Hemiptera: Triozidae) Central haplotype of tomato crops cultivated at different locations of Mexico
Source: PeerJ journal article supplement (doi:10.7717/peerj.16347), 2023-11-03
Supplement: FigureSF1.pdf [file FigureSF1.pdf]

1 \* 10 20 30 40 50 60 70 80 90 100 110 120 130  
 |-----|  
 Sinaloa TCATATATTGACAGTAGGTATAGATGTTGATTCTCGTGCCTATTTCACTTCCGCAACTATAATTATTGCTGTGCCACAGGAATTAARATTTTAGTTGATTAGCACTATTTATGGGATAAAATATAT  
 Queretaro TCATATATTGACAGTAGGTATAGATGTTGATTCTCGTGCCTATTTCACTTCCGCAACTATAATTATTGCTGTGCCACAGGAATTAARATTTTAGTTGATTAGCACTATTTATGGGATAAAATATAT  
 Coahuila TCATATATTGACAGTAGGTATAGATGTTGATTCTCGTGCCTATTTCACTTCCGCAACTATAATTATTGCTGTGCCACAGGAATTAARATTTTAGTTGATTAGCACTATTTATGGGATAAAATATAT  
 Nuevo Leon TCATATATTACAGTAGGTATAGATGTTGATTCTCGTGCCTATTTCACTTCCGCAACTATAATTATTGCTGTGCCACAGGAATTAARATTTTAGTTGATTAGCACTATTTATGGGATAAAATATAT  
 FJ175374.1Central TCATATATTACAGTAGGTATAGATGTTGATTCTCGTGCCTATTTCACTTCCGCAACTATAATTATTGCTGTGCCACAGGAATTAARATTTTAGTTGATTAGCACTATTTATGGGATAAAATATAT  
 EF372597.1Central TCATATATTACAGTAGGTATAGATGTTGATTCTCGTGCCTATTTCACTTCCGCAACTATAATTATTGCTGTGCCACAGGAATTAARATTTTAGTTGATTAGCACTATTTATGGGATAAAATATAT  
 JQ708095.1Western TCACATATTTACAGTAGGTATAGATGTTGATTCTCGTGCCTATTTCACTTCCGCAACTATAATTATTGCTGTGCCACAGGAATTAARATTTTAGTTGATTAGCACTATTTATGGGATAAAATATAT  
 AY971885.1Western TCACATATTTACAGTAGGTATAGATGTTGATTCTCGTGCCTATTTCACTTCCGCAACTATAATTATTGCTGTGCCACAGGAATTAARATTTTAGTTGATTAGCACTATTTATGGGATAAAATATAT  
 Consensus TCACATATTTACAGTAGGTATAGATGTTGATTCTCGTGCCTATTTCACTTCCGCAACTATAATTATTGCTGTGCCACAGGAATTAARATTTTAGTTGATTAGCACTATTTATGGGATAAAATATAT

131 140 150 160 170 180 190 200 210 220 230 240 250 260  
 |-----|  
 Sinaloa TTTTCTCCAAGTATTATTTGATCTCTAGGATTCATTTTCTGTTTACACTGGGAGGTTAACAGGTGTAATTTAGCAAACTTCAATTGACATTATTTACATGACACATACTATGTAGTAGCACATT  
 Queretaro TTTTCTCCAAGTATTATTTGATCTCTAGGATTCATTTTCTGTTTACACTGGGAGGTTAACAGGTGTAATTTAGCAAACTTCAATTGACATTATTTACATGACACATACTATGTAGTAGCACATT  
 Coahuila TTTTCTCCAAGTATTATTTGATCTCTAGGATTCATTTTCTGTTTACACTGGGAGGTTAACAGGTGTAATTTAGCAAACTTCAATTGACATTATTTACATGACACATACTATGTAGTAGCACATT  
 Nuevo Leon TTTTCTCCAAGTATTATTTGATCTCTAGGATTCATTTTCTGTTTACACTGGGAGGTTAACAGGTGTAATTTAGCAAACTTCAATTGACATTATTTACATGACACATACTATGTAGTAGCACATT  
 FJ175374.1Central TTTTCTCCAAGTATTATTTGATCTCTAGGATTCATTTTCTGTTTACACTGGGAGGTTAACAGGTGTAATTTAGCAAACTTCAATTGACATTATTTACATGACACATACTATGTAGTAGCACATT  
 EF372597.1Central TTTTCTCCAAGTATTATTTGATCTCTAGGATTCATTTTCTGTTTACACTGGGAGGTTAACAGGTGTAATTTAGCAAACTTCAATTGACATTATTTACATGACACATACTATGTAGTAGCACATT  
 JQ708095.1Western TTTTCTCCAAGTATTATTTGATCTCTAGGATTCATTTTCTGTTTACACTGGGAGGTTAACAGGTGTAATTTAGCAAACTTCAATTGACATTATTTACATGACACATACTATGTAGTAGCACATT  
 AY971885.1Western TTTTCTCCAAGTATTATTTGATCTCTAGGATTCATTTTCTGTTTACACTGGGAGGTTAACAGGTGTAATTTAGCAAACTTCAATTGACATTATTTACATGACACATACTATGTAGTAGCACATT  
 Consensus TTTTCTCCAAGTATTATTTGATCTCTAGGATTCATTTTCTGTTTACACTGGGAGGTTAACAGGTGTAATTTAGCAAACTTCAATTGACATTATTTACATGACACATACTATGTAGTAGCACATT

261 270 280 290 300 310 320 330 340 350 360 370 380 390  
 |-----|  
 Sinaloa TCCATTATGTTCTATCTATAGGGGCTGATTTTGC AATTATTGCTAGATTTATTAATTGATACCCCTTAATAACAGGAGTAATTATAAATAAACTTTATAAAAACACAATTTATTAGTACTTTTATTGG  
 Queretaro TCCATTATGTTCTATCTATAGGGGCTGATTTTGC AATTATTGCTAGATTTATTAATTGATACCCCTTAATAACAGGAGTAATTATAAATAAACTTTATAAAAACACAATTTATTAGTACTTTTATTGG  
 Coahuila TCCATTATGTTCTATCTATAGGGGCTGATTTTGC AATTATTGCTAGATTTATTAATTGATACCCCTTAATAACAGGAGTAATTATAAATAAACTTTATAAAAACACAATTTATTAGTACTTTTATTGG  
 Nuevo Leon TCCATTATGTTCTATCTATAGGGGCTGATTTTGC AATTATTGCTAGATTTATTAATTGATACCCCTTAATAACAGGAGTAATTATAAATAAACTTTATAAAAACACAATTTATTAGTACTTTTATTGG  
 FJ175374.1Central TCCATTATGTTCTATCTATAGGGGCTGATTTTGC AATTATTGCTAGATTTATTAATTGATACCCCTTAATAACAGGAGTAATTATAAATAAACTTTATAAAAACACAATTTATTAGTACTTTTATTGG  
 EF372597.1Central TCCATTATGTTCTATCTATAGGGGCTGATTTTGC AATTATTGCTAGATTTATTAATTGATACCCCTTAATAACAGGAGTAATTATAAATAAACTTTATAAAAACACAATTTATTAGTACTTTTATTGG  
 JQ708095.1Western TCCATTATGTTCTATCTATAGGGGCTGATTTTGC AATTATTGCTAGATTTATTAATTGATACCCCTTAATAACAGGAGTAATTATAAATAAACTTTATAAAAACACAATTTATTAGTACTTTTATTGG  
 AY971885.1Western TCCATTATGTTCTATCTATAGGGGCTGATTTTGC AATTATTGCTAGATTTATTAATTGATACCCCTTAATAACAGGAGTAATTATAAATAAACTTTATAAAAACACAATTTATTAGTACTTTTATTGG  
 Consensus TCCATTATGTTCTATCTATAGGGGCTGATTTTGC AATTATTGCTAGATTTATTAATTGATACCCCTTAATAACAGGAGTAATTATAAATAAACTTTATAAAAACACAATTTATTAGTACTTTTATTGG

391 400 410 420 430 440 450 455  
 |-----|  
 Sinaloa TGTTAACCTTACTTTTTTCCCCAACATTTCTTAGGACTCATAGGAATACCACGACGTTACTCAA  
 Queretaro TGTTAACCTTACTTTTTTCCCCAACATTTCTTAGGACTCATAGGAATACCACGACGTTACTCAA  
 Coahuila TGTTAACCTTACTTTTTTCCCCAACATTTCTTAGGACTCATAGGAATACCACGACGTTACTCAA  
 Nuevo Leon TGTTAACCTTACTTTTTTCCCCAACATTTCTTAGGACTCATAGGAATACCACGACGTTACTC  
 FJ175374.1Central TGTTAACCTTACTTTTTTCCCCAACATTTCTTAGGACTCATAGGAATACCACGACGTTACTC  
 EF372597.1Central TGTTAACCTTACTTTTTTCCCCAACATTTCTTAGGACTCATAGGAATACCACGACGTTACTC  
 JQ708095.1Western TGTTAACCTTACTTTTTTCCCCAACATTTCTTAGGACTCATAGGAATACCACGACGTTACTC  
 AY971885.1Western G  
 Consensus tgltaaccttactTTTTTCCCCAACATTTCTTAGGACTCATAGGAATACCACGACGTTACTC..
