# Supplementary material for: Bacterial communities of the psyllid pest Bactericera cockerelli (Hemiptera: Triozidae) Central haplotype of tomato crops cultivated at different locations of Mexico
Source: PeerJ journal article supplement (doi:10.7717/peerj.16347), 2023-11-03

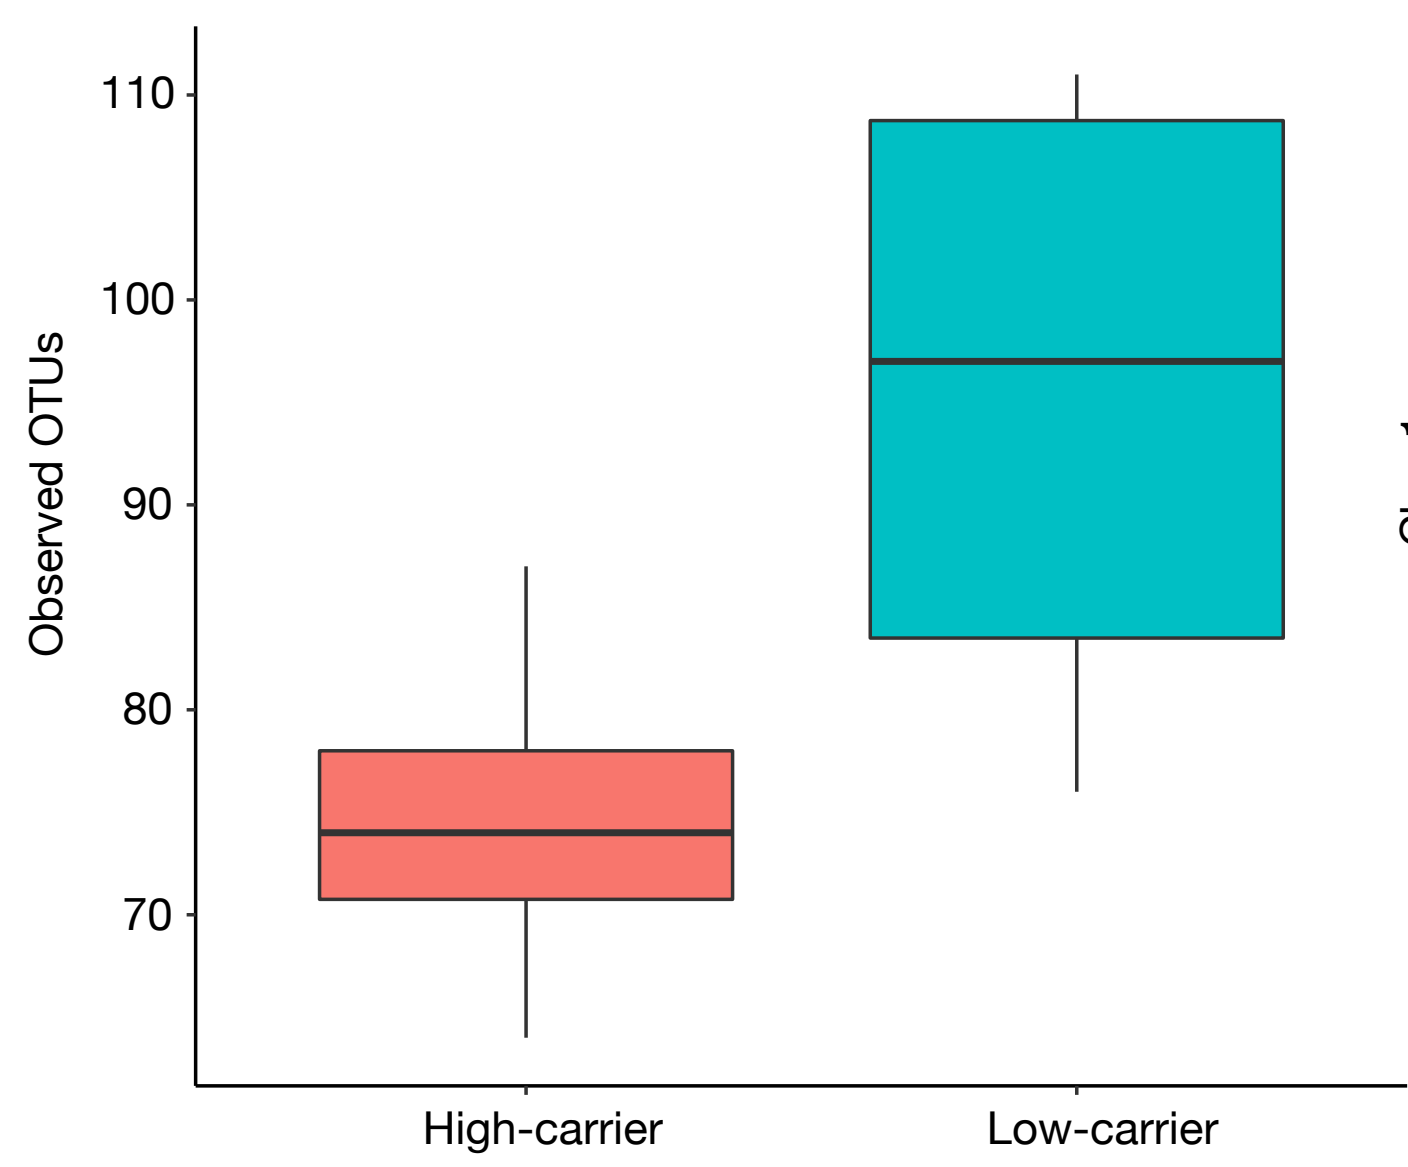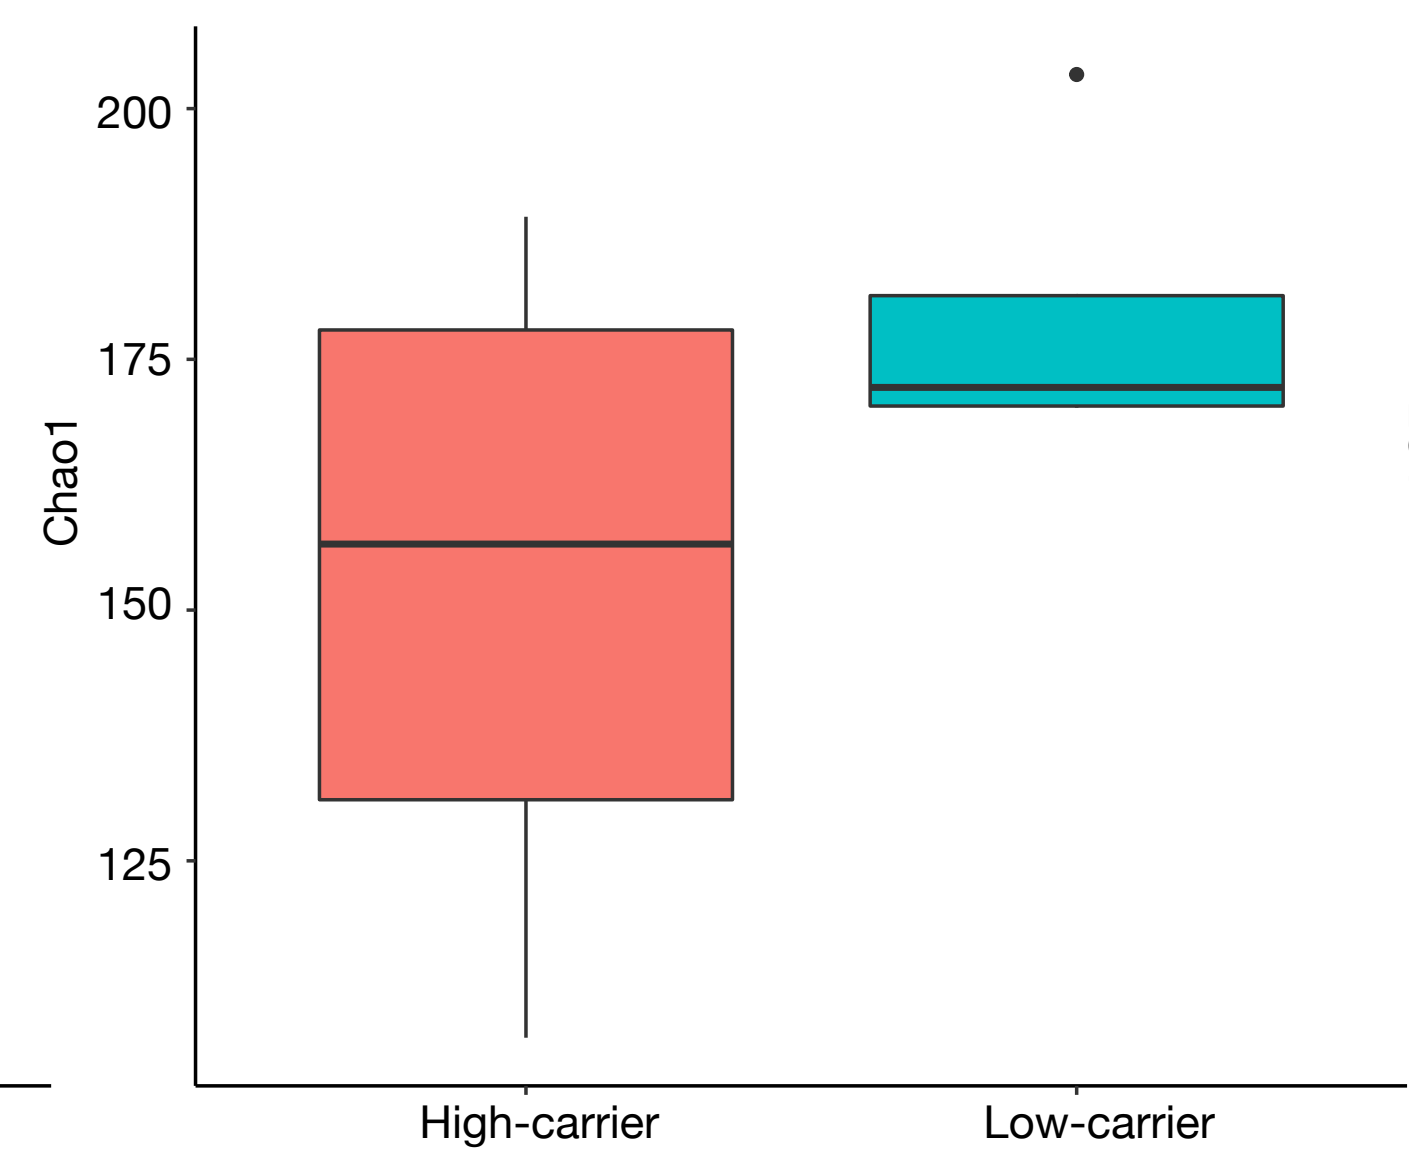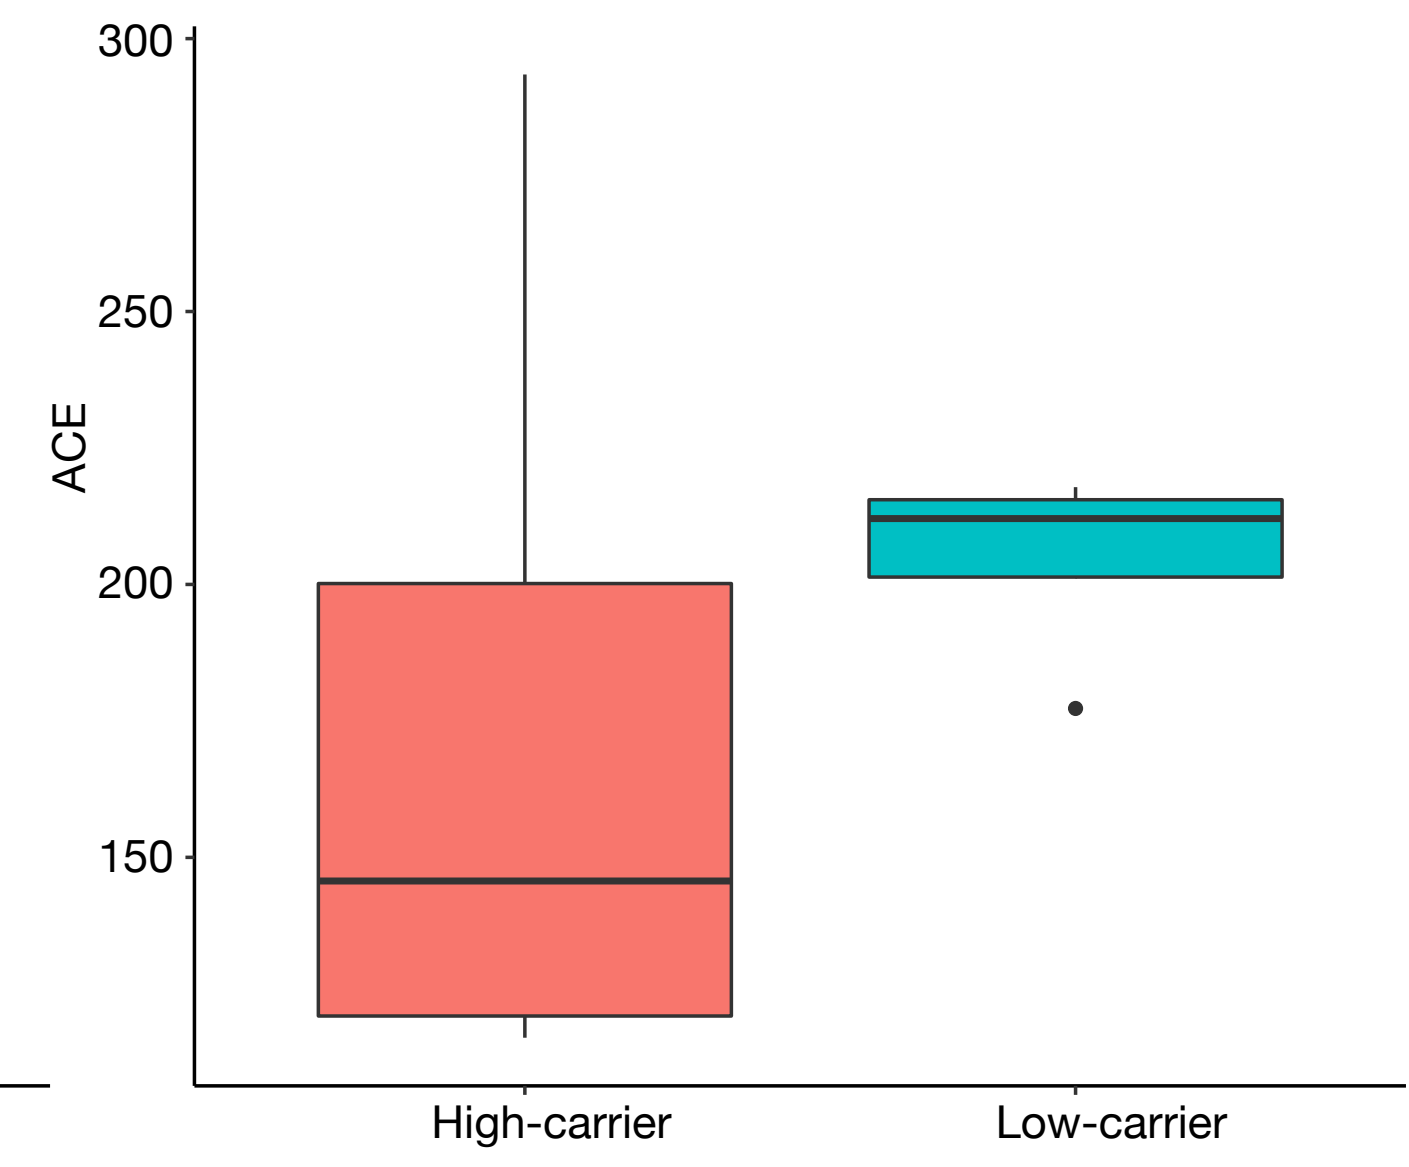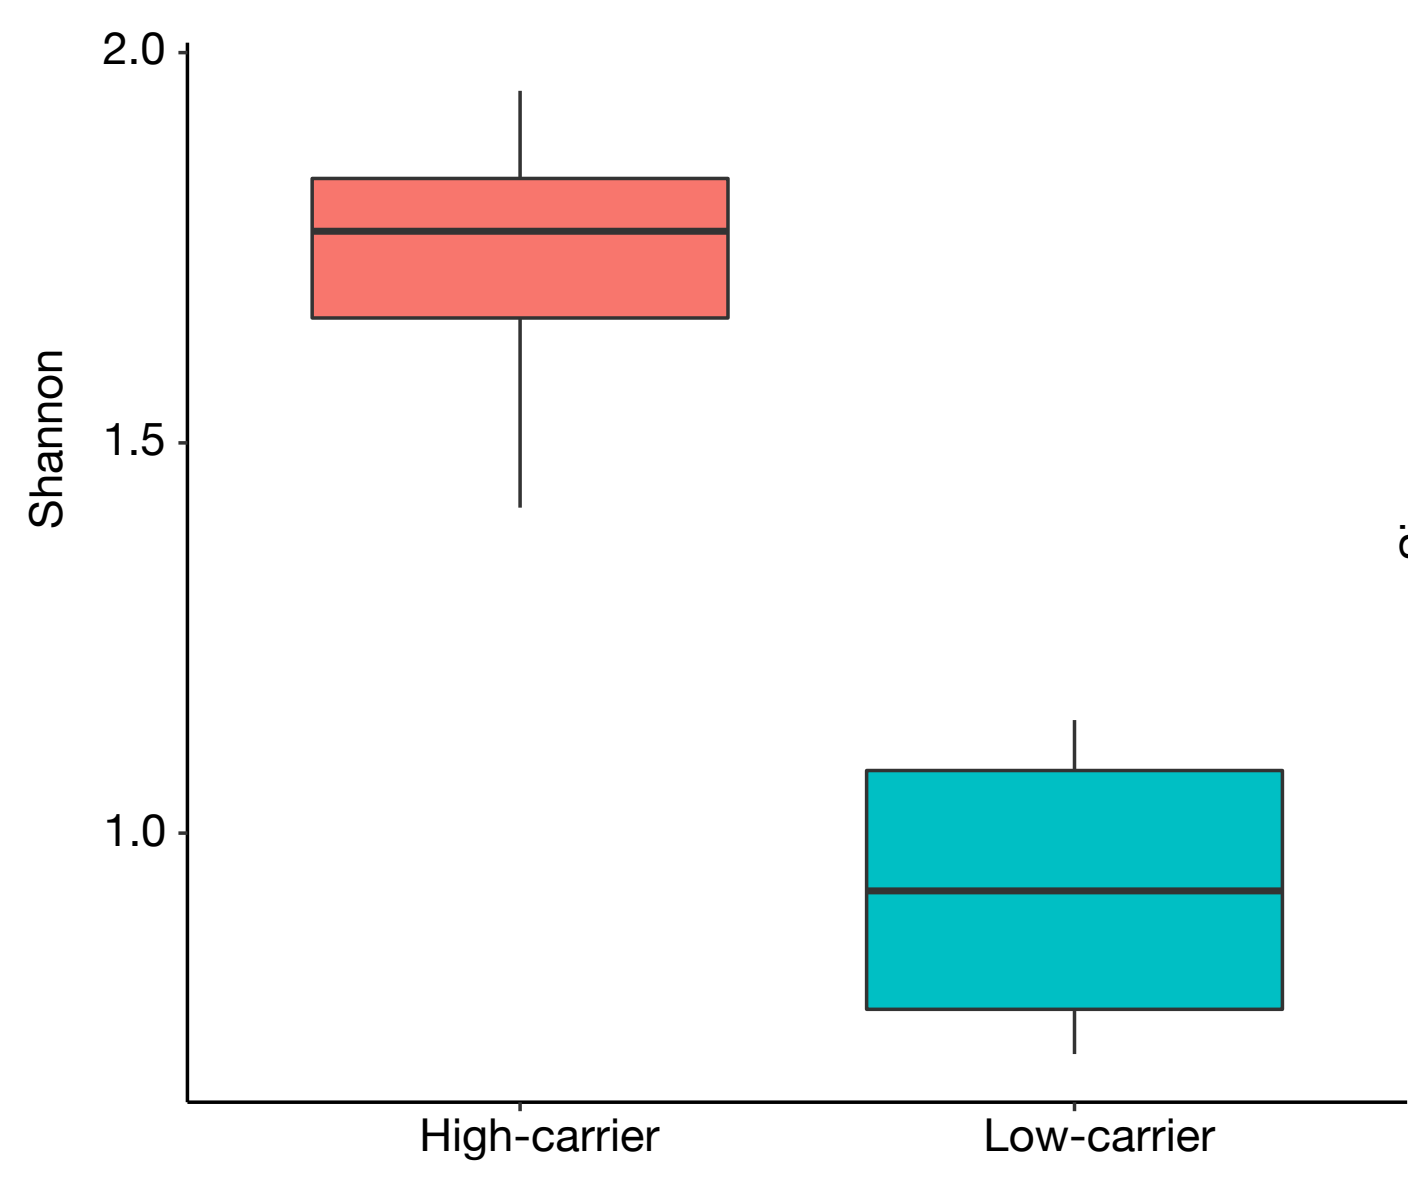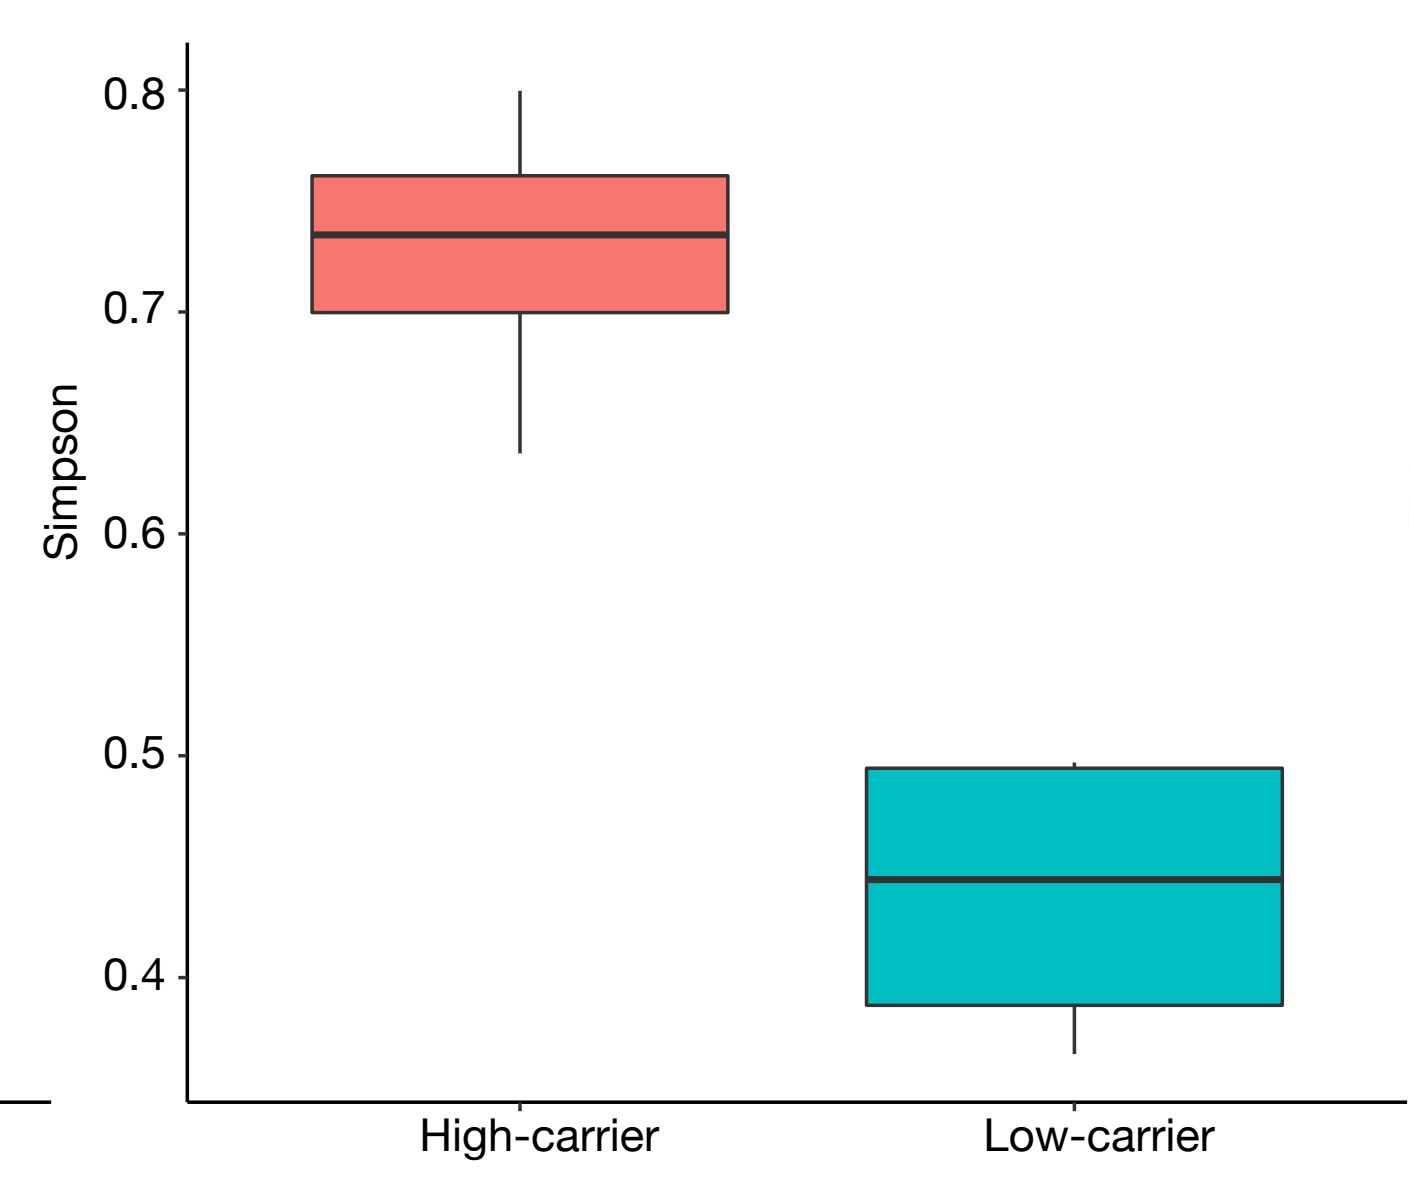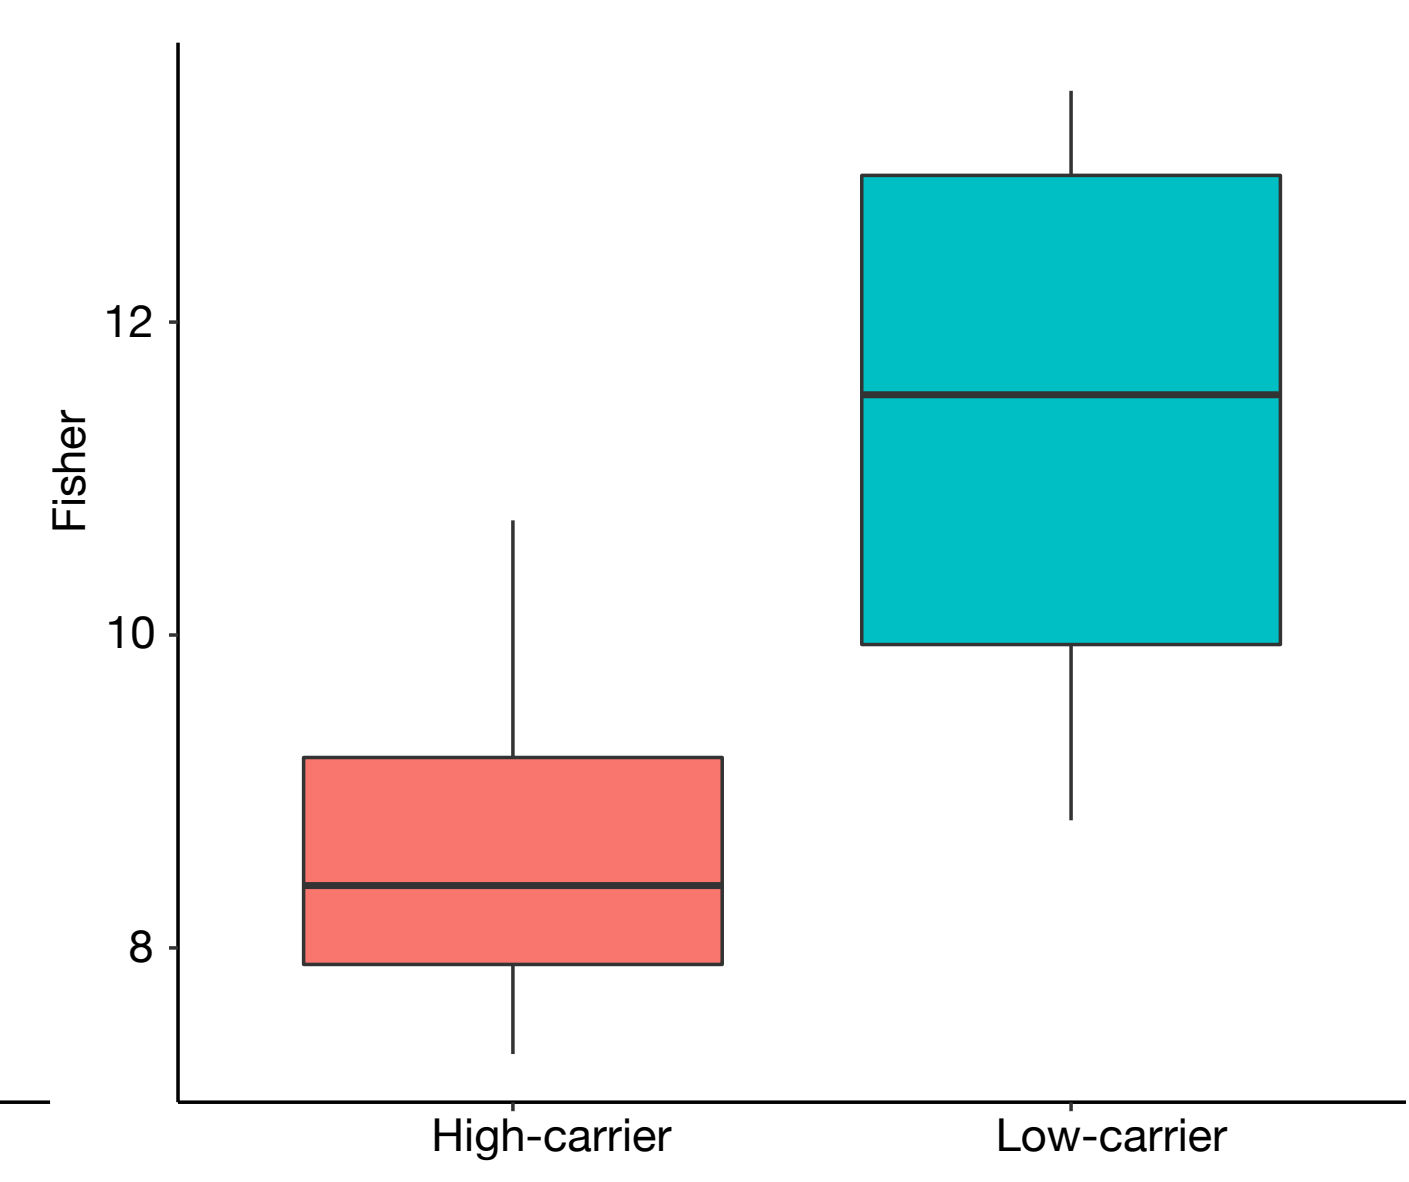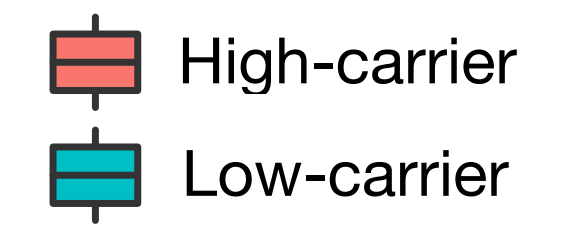

Supplement: FigureSF2.pdf [file FigureSF2.pdf]
